# Supplementary material for: FGF13 enhances resistance to platinum drugs by regulating hCTR1 and ATP7A via a microtubule‐stabilizing effect
Source: PubMed Central journal article supplement — Cancer Sci. 2021 Sep 28;112(11):4655–68. doi: 10.1111/cas.15137 (PMC8586689; doi:10.1111/cas.15137), 2021-09-28
Supplement: CAS-112-4655-s003.pdf [file CAS-112-4655-s003.pdf]

**Table S1: Primers for Quantitative RT-PCR**

| Species | Gene                  | Sequence(5'-3')         | Direction |
|---------|-----------------------|-------------------------|-----------|
| Human   | FGF13                 | CAGCCGACAAGGCTACCAC     | Forward   |
|         |                       | GTTCCGAGGTGTACAAGTATCC  | Reverse   |
|         | FGF13-S               | CGAGAAATCCAACGCCTGC     | Forward   |
|         |                       | CACCACTCGCAGACCCACAG    | Reverse   |
|         | FGF13-U               | GTTAAGGAAGTCGTATTCAGAGC | Forward   |
|         |                       | CACCACTCGCAGACCCACAG    | Reverse   |
|         | FGF13-V               | GCTTCTAAGGAGCCTCAGC     | Forward   |
|         |                       | CACCACTCGCAGACCCACAG    | Reverse   |
|         | FGF13-VY              | GCTTCTAAGGTTCTGGATGAC   | Forward   |
|         |                       | CACCACTCGCAGACCCACAG    | Reverse   |
|         | FGF13-VY&Y            | CACAGAGCCGGAAGAGCCTCAG  | Forward   |
|         |                       | CACCACTCGCAGACCCACAG    | Reverse   |
|         | ATAT1                 | TACATCCATGAGTCTGTGCAAC  | Forward   |
|         |                       | CTTCTGTGAGGGTCCGGTCAA   | Reverse   |
|         | CYLD                  | TCAGGCTTATGGAGCCAAGAA   | Forward   |
|         |                       | ACTTCCCTTCGGTACTTTAAGGA | Reverse   |
|         | ARD1                  | CCCCAGCTCTTACATTGCT     | Forward   |
|         |                       | GCCAATGAGGTGATATGTCCA   | Reverse   |
| GAPDH   | CATCAGCAATGCCTCCTGCA  | Forward                 |           |
|         | CCGTTTCAGCTCAGGGATGAC | Reverse                 |           |

Table S2: Target Sequences of shRNA

| NO.        | 5'         | STEM                           | Loop   | STEM                          | 3'     |
|------------|------------|--------------------------------|--------|-------------------------------|--------|
| FGF13 #1-a | Ccgg       | gaGATCA<br>TGAAAGG<br>CAACCAT  | CTCGAG | ATGGTTG<br>CCTTTCA<br>TGATCTC | TTTTTg |
| FGF13 #1-b | aattcaaaaa | gaGATCA<br>TGAAAGG<br>CAACCAT  | CTCGAG | ATGGTTG<br>CCTTTCA<br>TGATCTC |        |
| FGF13 #2-a | Ccgg       | caGCACT<br>TACTACTC<br>TGTTTAA | CTCGAG | TTAAACA<br>GAGTGTA<br>AGTGCTG | TTTTTg |
| FGF13 #2-b | aattcaaaaa | caGCACT<br>TACTACTC<br>TGTTTAA | CTCGAG | TTAAACA<br>GAGTGTA<br>AGTGCTG |        |

Insertion  
Sequence in  
Vector      TTCTCCGAACGTGTCACGT

**Table S3: Patients Information**

| Sample ID        | Cancer Type | Drug Used in Chemotherapy | Therapy Outcome     | FGF13 Gene Expression |
|------------------|-------------|---------------------------|---------------------|-----------------------|
| TCGA-97-7554-01A | LUAD        | Carboplatin               | Complete Response   | 15.73                 |
| TCGA-64-1679-01A | LUAD        | Cisplatin                 | Complete Response   | 13.96                 |
| TCGA-64-1678-01A | LUAD        | Carboplatin               | Complete Response   | 13.54                 |
| TCGA-44-6146-01B | LUAD        | Carboplatin               | Complete Response   | 13.53                 |
| TCGA-97-8175-01A | LUAD        | Cisplatin                 | Complete Response   | 13.44                 |
| TCGA-50-6590-01A | LUAD        | Carboplatin               | Complete Response   | 13.2                  |
| TCGA-86-A4D0-01A | LUAD        | Cisplatin                 | Complete Response   | 13.14                 |
| TCGA-73-7498-01A | LUAD        | Cisplatin                 | Complete Response   | 13.13                 |
| TCGA-86-8054-01A | LUAD        | Cisplatin                 | Complete Response   | 12.72                 |
| TCGA-75-6203-01A | LUAD        | Cisplatin                 | Complete Response   | 12.7                  |
| TCGA-55-7576-01A | LUAD        | Cisplatin                 | Complete Response   | 12.6                  |
| TCGA-75-7030-01A | LUAD        | Cisplatin                 | Complete Response   | 12.48                 |
| TCGA-73-4666-01A | LUAD        | Carboplatin               | Complete Response   | 12.35                 |
| TCGA-44-6146-11A | LUAD        | Carboplatin               | Complete Response   | 12.33                 |
| TCGA-44-6774-01A | LUAD        | Carboplatin               | Complete Response   | 12.18                 |
| TCGA-75-6212-01A | LUAD        | Carboplatin               | Complete Response   | 12.18                 |
| TCGA-44-6146-01A | LUAD        | Carboplatin               | Complete Response   | 11.74                 |
| TCGA-L9-A743-01A | LUAD        | Cisplatin                 | Complete Response   | 11.57                 |
| TCGA-86-8076-01A | LUAD        | Cisplatin                 | Complete Response   | 11.45                 |
| TCGA-86-8279-01A | LUAD        | Cisplatin                 | Complete Response   | 10.95                 |
| TCGA-55-7910-01A | LUAD        | Cisplatin                 | Complete Response   | 9.542                 |
| TCGA-86-8674-01A | LUAD        | Cisplatin                 | Complete Response   | 9.025                 |
| TCGA-86-7713-01A | LUAD        | Cisplatin                 | Complete Response   | 8.838                 |
| TCGA-86-7955-01A | LUAD        | Cisplatin                 | Complete Response   | 7.783                 |
| TCGA-93-A4JP-01A | LUAD        | Carboplatin               | Partial Response    | 14.47                 |
| TCGA-MP-A4TF-01A | LUAD        | Cisplatin                 | Partial Response    | 12.34                 |
| TCGA-44-2665-01A | LUAD        | Cisplatin                 | Stable Disease      | 13.87                 |
| TCGA-44-2665-11A | LUAD        | Cisplatin                 | Stable Disease      | 13.58                 |
| TCGA-49-AAR4-01A | LUAD        | Carboplatin               | Stable Disease      | 12.63                 |
| TCGA-93-A4JN-01A | LUAD        | Carboplatin               | Stable Disease      | 10.87                 |
| TCGA-64-5775-01A | LUAD        | Carboplatin               | Progressive Disease | 14.57                 |
| TCGA-86-6562-01A | LUAD        | Cisplatin                 | Progressive Disease | 14.31                 |
| TCGA-50-6595-01A | LUAD        | Carboplatin               | Progressive Disease | 13.23                 |
| TCGA-50-6595-11A | LUAD        | Carboplatin               | Progressive Disease | 12.13                 |
| TCGA-69-7974-01A | LUAD        | Carboplatin               | Progressive Disease | 12.07                 |
| TCGA-78-7161-01A | LUAD        | Cisplatin                 | Progressive Disease | 11.44                 |
| TCGA-46-6026-01A | LUSC        | Carboplatin               | Complete Response   | 15.75                 |
| TCGA-43-2581-01A | LUSC        | Cisplatin                 | Complete Response   | 14.14                 |
| TCGA-85-7698-01A | LUSC        | Cisplatin                 | Complete Response   | 13.95                 |
| TCGA-60-2708-01A | LUSC        | Carboplatin               | Complete Response   | 13.92                 |
| TCGA-60-2713-01A | LUSC        | Cisplatin                 | Complete Response   | 13.63                 |
| TCGA-85-6798-01A | LUSC        | Cisplatin                 | Complete Response   | 13.48                 |
| TCGA-98-A53I-01A | LUSC        | Cisplatin                 | Complete Response   | 13.3                  |
| TCGA-63-A5ML-01A | LUSC        | Cisplatin                 | Complete Response   | 12.75                 |
| TCGA-96-A4JK-01A | LUSC        | Cisplatin                 | Complete Response   | 12.68                 |
| TCGA-85-A512-01A | LUSC        | Cisplatin                 | Complete Response   | 12.55                 |
| TCGA-43-5670-11A | LUSC        | Cisplatin                 | Complete Response   | 12.51                 |
| TCGA-33-6738-01A | LUSC        | Cisplatin                 | Complete Response   | 12.16                 |
| TCGA-22-5489-11A | LUSC        | Carboplatin               | Complete Response   | 11.95                 |
| TCGA-22-5483-11A | LUSC        | Cisplatin                 | Complete Response   | 11.94                 |
| TCGA-46-3768-01A | LUSC        | Carboplatin&Pa            | Complete Response   | 11.89                 |
| TCGA-43-6647-11A | LUSC        | Carboplatin               | Complete Response   | 11.88                 |
| TCGA-22-5483-01A | LUSC        | Cisplatin                 | Complete Response   | 11.54                 |
| TCGA-22-5473-01A | LUSC        | Carboplatin               | Complete Response   | 11.52                 |
| TCGA-85-6561-01A | LUSC        | Carboplatin               | Complete Response   | 11.35                 |

|                  |      |                 |                     |       |
|------------------|------|-----------------|---------------------|-------|
| TCGA-22-5489-01A | LUSC | Carboplatin     | Complete Response   | 11.34 |
| TCGA-90-A59Q-01A | LUSC | Cisplatin       | Complete Response   | 11.16 |
| TCGA-63-A5MM-01A | LUSC | Cisplatin       | Complete Response   | 11.16 |
| TCGA-22-4595-01A | LUSC | Carboplatin     | Complete Response   | 11.14 |
| TCGA-63-A5MJ-01A | LUSC | Carboplatin     | Complete Response   | 11.03 |
| TCGA-96-A4JL-01A | LUSC | Carboplatin     | Complete Response   | 10.26 |
| TCGA-85-6560-01A | LUSC | Cisplatin       | Complete Response   | 10.21 |
| TCGA-46-3769-01A | LUSC | Cisplatin&Etopo | Complete Response   | 10.01 |
| TCGA-85-A50Z-01A | LUSC | Cisplatin       | Complete Response   | 9.726 |
| TCGA-43-5670-01A | LUSC | Cisplatin       | Complete Response   | 9.682 |
| TCGA-18-3415-01A | LUSC | Carboplatin     | Complete Response   | 9.632 |
| TCGA-92-8063-01A | LUSC | Carboplatin     | Complete Response   | 9.423 |
| TCGA-43-6647-01A | LUSC | Carboplatin     | Complete Response   | 9.278 |
| TCGA-60-2714-01A | LUSC | Carboplatin     | Complete Response   | 9.023 |
| TCGA-85-8664-01A | LUSC | Carboplatin     | Complete Response   | 7.532 |
| TCGA-56-8308-01A | LUSC | Carboplatin     | Stable Disease      | 14.07 |
| TCGA-NK-A5D1-01A | LUSC | Carboplatin     | Progressive Disease | 13.36 |
| TCGA-33-4587-11A | LUSC | Carboplatin     | Progressive Disease | 12.78 |
| TCGA-60-2715-01A | LUSC | Cisplatin       | Progressive Disease | 12.02 |
| TCGA-33-4587-01A | LUSC | Carboplatin     | Progressive Disease | 10.75 |
| TCGA-AP-A1E0-01A | UCEC | Carboplatin     | Complete Response   | 14.61 |
| TCGA-A5-A1OH-01A | UCEC | Carboplatin     | Complete Response   | 14.42 |
| TCGA-B5-A5OC-01A | UCEC | Cisplatin       | Complete Response   | 13.46 |
| TCGA-B5-A3S1-01A | UCEC | Carboplatin     | Complete Response   | 13.42 |
| TCGA-D1-A16N-01A | UCEC | Carboplatin     | Complete Response   | 13.16 |
| TCGA-D1-A175-01A | UCEC | Carboplatin     | Complete Response   | 13.11 |
| TCGA-EY-A2OM-01A | UCEC | Carboplatin     | Complete Response   | 13.01 |
| TCGA-AX-A1CA-01A | UCEC | Carboplatin     | Complete Response   | 12.47 |
| TCGA-EY-A3QX-01A | UCEC | Carboplatin     | Complete Response   | 12.2  |
| TCGA-A5-A2K4-01A | UCEC | Carboplatin     | Complete Response   | 12.14 |
| TCGA-EO-A3KU-01A | UCEC | Carboplatin     | Complete Response   | 11.93 |
| TCGA-AP-A05D-01A | UCEC | Carboplatin     | Complete Response   | 11.92 |
| TCGA-BG-A0MS-01A | UCEC | Carboplatin     | Complete Response   | 11.91 |
| TCGA-B5-A0JZ-01A | UCEC | Carboplatin     | Complete Response   | 11.8  |
| TCGA-E6-A1LZ-01A | UCEC | Carboplatin     | Complete Response   | 11.63 |
| TCGA-EY-A1GT-01A | UCEC | Carboplatin     | Complete Response   | 11.44 |
| TCGA-PG-A7D5-01A | UCEC | Carboplatin&Pa  | Complete Response   | 10.87 |
| TCGA-QF-A5YT-01A | UCEC | Cisplatin       | Complete Response   | 10.8  |
| TCGA-D1-A15W-01A | UCEC | Carboplatin     | Complete Response   | 10.78 |
| TCGA-D1-A16D-01A | UCEC | Carboplatin     | Complete Response   | 10.5  |
| TCGA-AJ-A3BI-01A | UCEC | Carboplatin     | Complete Response   | 10.37 |
| TCGA-D1-A17D-01A | UCEC | Carboplatin     | Complete Response   | 10.13 |
| TCGA-AP-A1DR-01A | UCEC | Carboplatin     | Complete Response   | 10.11 |
| TCGA-E6-A8L9-01A | UCEC | Carboplatin     | Complete Response   | 9.97  |
| TCGA-AP-A05J-01A | UCEC | Carboplatin     | Complete Response   | 9.658 |
| TCGA-A5-A3LP-01A | UCEC | Carboplatin     | Complete Response   | 9.562 |
| TCGA-A5-A3LO-01A | UCEC | Carboplatin     | Complete Response   | 9.497 |
| TCGA-A5-A2K3-01A | UCEC | Carboplatin     | Complete Response   | 9.196 |
| TCGA-EY-A3L3-01A | UCEC | Carboplatin     | Complete Response   | 9.143 |
| TCGA-BG-A2L7-01A | UCEC | Carboplatin     | Complete Response   | 9.097 |
| TCGA-A5-A2K7-01A | UCEC | Carboplatin     | Complete Response   | 9.089 |
| TCGA-AP-A0LI-01A | UCEC | Carboplatin     | Complete Response   | 9.077 |
| TCGA-D1-A1NU-01A | UCEC | Carboplatin     | Complete Response   | 9.024 |
| TCGA-D1-A1NY-01A | UCEC | Carboplatin     | Complete Response   | 8.999 |
| TCGA-D1-A16J-01A | UCEC | Carboplatin     | Complete Response   | 8.72  |
| TCGA-BG-A0M4-01A | UCEC | Carboplatin     | Complete Response   | 8.411 |
| TCGA-EY-A1GQ-01A | UCEC | Carboplatin     | Partial Response    | 12.44 |
| TCGA-D1-A1NX-01A | UCEC | Carboplatin     | Partial Response    | 11.94 |

|                  |      |                |                     |       |
|------------------|------|----------------|---------------------|-------|
| TCGA-2E-A9G8-01A | UCEC | Carboplatin    | Partial Response    | 9.561 |
| TCGA-AX-A2IO-01A | UCEC | Carboplatin&Pa | Stable Disease      | 12.85 |
| TCGA-B5-A11I-01A | UCEC | Carboplatin    | Stable Disease      | 10.8  |
| TCGA-AP-A054-01A | UCEC | Carboplatin    | Progressive Disease | 16.01 |
| TCGA-AX-A0IS-01A | UCEC | Carboplatin    | Progressive Disease | 15.31 |
| TCGA-BG-A3PP-11A | UCEC | Carboplatin    | Progressive Disease | 14.58 |
| TCGA-BG-A3PP-01A | UCEC | Carboplatin    | Progressive Disease | 14.09 |
| TCGA-B5-A1MY-01A | UCEC | Carboplatin    | Progressive Disease | 13.22 |
| TCGA-A5-A0G3-01A | UCEC | Carboplatin    | Progressive Disease | 13.05 |
| TCGA-EY-A1GM-01A | UCEC | Carboplatin    | Progressive Disease | 12.69 |
| TCGA-D1-A16G-01A | UCEC | Carboplatin    | Progressive Disease | 12.19 |
| TCGA-AX-A3FX-01A | UCEC | Carboplatin&Do | Progressive Disease | 11.96 |
| TCGA-AJ-A3BF-01A | UCEC | Carboplatin    | Progressive Disease | 10.61 |
| TCGA-AP-A3K1-01A | UCEC | Carboplatin    | Progressive Disease | 9.991 |
| TCGA-HM-A6W2-01A | CESC | Cisplatin      | Complete Response   | 15.21 |
| TCGA-MY-A5BF-11A | CESC | Cisplatin      | Complete Response   | 14.06 |
| TCGA-FU-A3HZ-01A | CESC | Cisplatin      | Complete Response   | 13.76 |
| TCGA-DS-A3LQ-01A | CESC | Cisplatin      | Complete Response   | 13.42 |
| TCGA-VS-A957-01A | CESC | Cisplatin      | Complete Response   | 13.08 |
| TCGA-Q1-A73S-01A | CESC | Cisplatin      | Complete Response   | 13    |
| TCGA-FU-A23L-01A | CESC | Cisplatin      | Complete Response   | 12.29 |
| TCGA-C5-A7CO-01A | CESC | Cisplatin      | Complete Response   | 11.96 |
| TCGA-DS-A0VN-01A | CESC | Cisplatin      | Complete Response   | 11.61 |
| TCGA-C5-A7UE-01A | CESC | Cisplatin      | Complete Response   | 11.44 |
| TCGA-DG-A2KJ-01A | CESC | Cisplatin      | Complete Response   | 10.79 |
| TCGA-HM-A6W2-06A | CESC | Cisplatin      | Complete Response   | 10.73 |
| TCGA-MA-AA3X-01A | CESC | Cisplatin      | Complete Response   | 10.72 |
| TCGA-WL-A834-01A | CESC | Carboplatin    | Complete Response   | 10.59 |
| TCGA-IR-A3LL-01A | CESC | Cisplatin      | Complete Response   | 10.58 |
| TCGA-EA-A3QD-01A | CESC | Cisplatin      | Complete Response   | 10.54 |
| TCGA-C5-A2LX-01A | CESC | Cisplatin      | Complete Response   | 10.1  |
| TCGA-DR-A0ZM-01A | CESC | Cisplatin      | Complete Response   | 10.09 |
| TCGA-C5-A1BQ-01C | CESC | Cisplatin      | Complete Response   | 10.07 |
| TCGA-VS-A9U7-01A | CESC | Cisplatin      | Complete Response   | 10.06 |
| TCGA-HM-A3JK-01A | CESC | Cisplatin      | Complete Response   | 9.994 |
| TCGA-IR-A3L7-01A | CESC | Cisplatin      | Complete Response   | 9.97  |
| TCGA-C5-A8XJ-01A | CESC | Cisplatin      | Complete Response   | 9.934 |
| TCGA-DS-A5RQ-01A | CESC | Cisplatin      | Complete Response   | 9.739 |
| TCGA-DS-A1OD-01A | CESC | Cisplatin      | Complete Response   | 9.702 |
| TCGA-VS-A8EI-01A | CESC | Cisplatin      | Complete Response   | 9.621 |
| TCGA-DG-A2KL-01A | CESC | Cisplatin      | Complete Response   | 9.59  |
| TCGA-DG-A2KM-01A | CESC | Cisplatin      | Complete Response   | 9.583 |
| TCGA-VS-A8QF-01A | CESC | Cisplatin      | Complete Response   | 9.552 |
| TCGA-C5-A2LT-01A | CESC | Cisplatin      | Complete Response   | 9.548 |
| TCGA-MY-A5BD-01A | CESC | Cisplatin      | Complete Response   | 9.516 |
| TCGA-VS-A94Z-01A | CESC | Cisplatin      | Complete Response   | 9.478 |
| TCGA-VS-A954-01A | CESC | Cisplatin      | Complete Response   | 9.476 |
| TCGA-DS-A1OC-01A | CESC | Cisplatin      | Complete Response   | 9.397 |
| TCGA-DS-A7WH-01A | CESC | Cisplatin      | Complete Response   | 9.393 |
| TCGA-EX-A3L1-01A | CESC | Cisplatin      | Complete Response   | 9.314 |
| TCGA-VS-A9V0-01A | CESC | Cisplatin      | Complete Response   | 9.28  |
| TCGA-2W-A8YY-01A | CESC | Cisplatin      | Complete Response   | 9.251 |
| TCGA-C5-A7UH-01A | CESC | Cisplatin      | Complete Response   | 9.202 |
| TCGA-C5-A907-01A | CESC | Cisplatin      | Complete Response   | 9.177 |
| TCGA-VS-A94W-01A | CESC | Cisplatin      | Complete Response   | 9.15  |
| TCGA-HM-A4S6-01A | CESC | Cisplatin      | Complete Response   | 8.754 |
| TCGA-IR-A3LH-01A | CESC | Cisplatin      | Complete Response   | 8.678 |
| TCGA-MA-AA3W-01A | CESC | Cisplatin      | Complete Response   | 8.554 |

|                  |      |             |                     |       |
|------------------|------|-------------|---------------------|-------|
| TCGA-DS-A0VM-01A | CESC | Cisplatin   | Complete Response   | 8.535 |
| TCGA-C5-A7CM-01A | CESC | Cisplatin   | Complete Response   | 8.528 |
| TCGA-VS-A9UD-01A | CESC | Cisplatin   | Complete Response   | 8.431 |
| TCGA-VS-A9U5-01A | CESC | Cisplatin   | Complete Response   | 8.427 |
| TCGA-VS-A958-01A | CESC | Cisplatin   | Complete Response   | 8.354 |
| TCGA-FU-A3HY-01A | CESC | Cisplatin   | Complete Response   | 8.353 |
| TCGA-IR-A3LC-01A | CESC | Cisplatin   | Complete Response   | 8.331 |
| TCGA-VS-A9UH-01A | CESC | Cisplatin   | Complete Response   | 8.131 |
| TCGA-DS-A1OB-01A | CESC | Carboplatin | Complete Response   | 7.987 |
| TCGA-VS-A8EL-01A | CESC | Cisplatin   | Complete Response   | 7.9   |
| TCGA-MY-A913-01A | CESC | Cisplatin   | Complete Response   | 7.856 |
| TCGA-VS-A9UB-01A | CESC | Cisplatin   | Complete Response   | 7.841 |
| TCGA-Q1-A5R3-01A | CESC | Cisplatin   | Complete Response   | 7.811 |
| TCGA-Q1-A73O-01A | CESC | Cisplatin   | Complete Response   | 7.617 |
| TCGA-IR-A3LI-01A | CESC | Cisplatin   | Complete Response   | 7.525 |
| TCGA-EK-A2H0-01A | CESC | Cisplatin   | Complete Response   | 7.349 |
| TCGA-Q1-A5R2-01A | CESC | Cisplatin   | Complete Response   | 7.296 |
| TCGA-DS-A7WI-01A | CESC | Cisplatin   | Complete Response   | 6.971 |
| TCGA-VS-A8EH-01A | CESC | Cisplatin   | Complete Response   | 6.966 |
| TCGA-DG-A2KK-01A | CESC | Cisplatin   | Complete Response   | 6.833 |
| TCGA-JW-A5VG-01A | CESC | Cisplatin   | Complete Response   | 6.342 |
| TCGA-MY-A5BF-01A | CESC | Cisplatin   | Complete Response   | 6.229 |
| TCGA-VS-A9UO-01A | CESC | Cisplatin   | Complete Response   | 6.18  |
| TCGA-VS-A9UU-01A | CESC | Cisplatin   | Complete Response   | 5.424 |
| TCGA-C5-A1MQ-01A | CESC | Cisplatin   | Complete Response   | 5.101 |
| TCGA-Q1-A73Q-01A | CESC | Cisplatin   | Partial Response    | 13.29 |
| TCGA-HG-A2PA-01A | CESC | Carboplatin | Partial Response    | 12.16 |
| TCGA-DS-A7WF-01A | CESC | Cisplatin   | Partial Response    | 10.76 |
| TCGA-PN-A8MA-01A | CESC | Cisplatin   | Stable Disease      | 12    |
| TCGA-VS-A9UC-01A | CESC | Cisplatin   | Stable Disease      | 8.813 |
| TCGA-VS-A9UP-01A | CESC | Cisplatin   | Progressive Disease | 13.75 |
| TCGA-HM-A3JJ-11A | CESC | Cisplatin   | Progressive Disease | 13.25 |
| TCGA-C5-A1BE-01B | CESC | Cisplatin   | Progressive Disease | 13    |
| TCGA-C5-A1MH-01A | CESC | Cisplatin   | Progressive Disease | 11.93 |
| TCGA-C5-A1BF-01B | CESC | Cisplatin   | Progressive Disease | 11.47 |
| TCGA-DS-A0VK-01A | CESC | Carboplatin | Progressive Disease | 9.966 |
| TCGA-C5-A1MI-01A | CESC | Cisplatin   | Progressive Disease | 9.753 |
| TCGA-HM-A3JJ-01A | CESC | Cisplatin   | Progressive Disease | 9.733 |
| TCGA-C5-A1MK-01A | CESC | Carboplatin | Progressive Disease | 9.25  |
| TCGA-C5-A1M9-01A | CESC | Cisplatin   | Progressive Disease | 8.719 |
| TCGA-VS-A9U6-01A | CESC | Cisplatin   | Progressive Disease | 8.545 |
| TCGA-C5-A0TN-01A | CESC | Cisplatin   | Progressive Disease | 8.208 |
| TCGA-C5-A1BN-01B | CESC | Cisplatin   | Progressive Disease | 7.814 |
| TCGA-DK-AA6T-01A | BLCA | Carboplatin | Complete Response   | 15.48 |
| TCGA-FD-A43S-01A | BLCA | Cisplatin   | Complete Response   | 12.04 |
| TCGA-DK-A3WY-01A | BLCA | Cisplatin   | Complete Response   | 12.01 |
| TCGA-XF-A9T5-01A | BLCA | Cisplatin   | Complete Response   | 12    |
| TCGA-XF-AAMY-01A | BLCA | Carboplatin | Complete Response   | 11.01 |
| TCGA-FD-A6TA-01A | BLCA | Cisplatin   | Complete Response   | 10.66 |
| TCGA-SY-A9G5-01A | BLCA | Cisplatin   | Complete Response   | 10.55 |
| TCGA-FJ-A3ZF-01A | BLCA | Cisplatin   | Complete Response   | 10.5  |
| TCGA-E5-A2PC-01A | BLCA | Cisplatin   | Complete Response   | 10.46 |
| TCGA-FD-A3SP-01A | BLCA | Cisplatin   | Complete Response   | 10.35 |
| TCGA-GC-A3YS-01A | BLCA | Carboplatin | Complete Response   | 10.26 |
| TCGA-ZF-AA58-01A | BLCA | Cisplatin   | Complete Response   | 10.22 |
| TCGA-ZF-AA51-01A | BLCA | Cisplatin   | Complete Response   | 9.848 |
| TCGA-CU-A3YL-01A | BLCA | Cisplatin   | Complete Response   | 9.767 |
| TCGA-FJ-A3Z9-01A | BLCA | Cisplatin   | Complete Response   | 9.702 |

|                  |      |                 |                     |       |
|------------------|------|-----------------|---------------------|-------|
| TCGA-G2-AA3D-01A | BLCA | Cisplatin       | Complete Response   | 9.658 |
| TCGA-DK-AA6M-01A | BLCA | Cisplatin       | Complete Response   | 9.619 |
| TCGA-ZF-AA53-01A | BLCA | Cisplatin       | Complete Response   | 9.559 |
| TCGA-DK-A1AC-01A | BLCA | Cisplatin       | Complete Response   | 9.208 |
| TCGA-DK-AA6U-01A | BLCA | Cisplatin       | Complete Response   | 9.125 |
| TCGA-G2-AA3F-01A | BLCA | Cisplatin       | Complete Response   | 8.843 |
| TCGA-G2-A2EF-01A | BLCA | Cisplatin       | Complete Response   | 8.249 |
| TCGA-FD-A6TC-01A | BLCA | Carboplatin     | Complete Response   | 8.139 |
| TCGA-ZF-AA4V-01A | BLCA | Cisplati&Gemcit | Complete Response   | 8.07  |
| TCGA-LT-A5Z6-01A | BLCA | Cisplatin       | Complete Response   | 7.986 |
| TCGA-DK-A6B6-01A | BLCA | Cisplatin       | Complete Response   | 7.972 |
| TCGA-BT-A3PJ-01A | BLCA | Carboplatin     | Complete Response   | 7.454 |
| TCGA-UY-A8OB-01A | BLCA | Cisplatin       | Complete Response   | 6.221 |
| TCGA-FD-A3SL-01A | BLCA | Cisplatin       | Stable Disease      | 12.66 |
| TCGA-K4-AAQO-01A | BLCA | Cisplatin       | Stable Disease      | 12.54 |
| TCGA-DK-A1A7-01A | BLCA | Cisplatin       | Stable Disease      | 11.12 |
| TCGA-FD-A5BS-01A | BLCA | Cisplatin       | Stable Disease      | 10.57 |
| TCGA-DK-AA6R-01A | BLCA | Cisplatin       | Stable Disease      | 8.703 |
| TCGA-BT-A20N-11A | BLCA | Cisplatin       | Progressive Disease | 13.73 |
| TCGA-G2-A2EC-01A | BLCA | Cisplatin       | Progressive Disease | 11.71 |
| TCGA-G2-A2EK-01A | BLCA | Cisplatin       | Progressive Disease | 11.55 |
| TCGA-FD-A3SR-01A | BLCA | Cisplatin       | Progressive Disease | 11.4  |
| TCGA-BT-A20T-01A | BLCA | Cisplatin       | Progressive Disease | 11.22 |
| TCGA-DK-A3IU-01A | BLCA | Carboplatin     | Progressive Disease | 11.13 |
| TCGA-FD-A62S-01A | BLCA | Carboplatin     | Progressive Disease | 10.68 |
| TCGA-FD-A3B4-01A | BLCA | Cisplatin       | Progressive Disease | 10.35 |
| TCGA-DK-A3WX-01A | BLCA | Cisplatin       | Progressive Disease | 9.833 |
| TCGA-UY-A78L-01A | BLCA | Cisplatin       | Progressive Disease | 9.795 |
| TCGA-FD-A3SS-01A | BLCA | Cisplatin       | Progressive Disease | 9.751 |
| TCGA-FD-A3SO-01A | BLCA | Cisplatin       | Progressive Disease | 9.615 |
| TCGA-ZF-AA5H-01A | BLCA | Cisplatin       | Progressive Disease | 8.911 |
| TCGA-DK-A3IV-01A | BLCA | Cisplatin       | Progressive Disease | 8.438 |
| TCGA-G2-A3IE-01A | BLCA | Cisplatin       | Progressive Disease | 8.013 |
| TCGA-BT-A20N-01A | BLCA | Cisplatin       | Progressive Disease | 6.9   |
